# Supplementary material
Source: Springer Nature journal article supplement (https://www.springermedizin.de/resource/supplementary/12886_2014_462_MOESM1_ESM.pdf/9474294)

**A**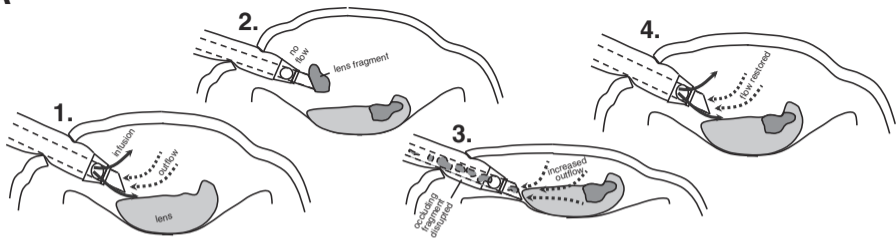**B**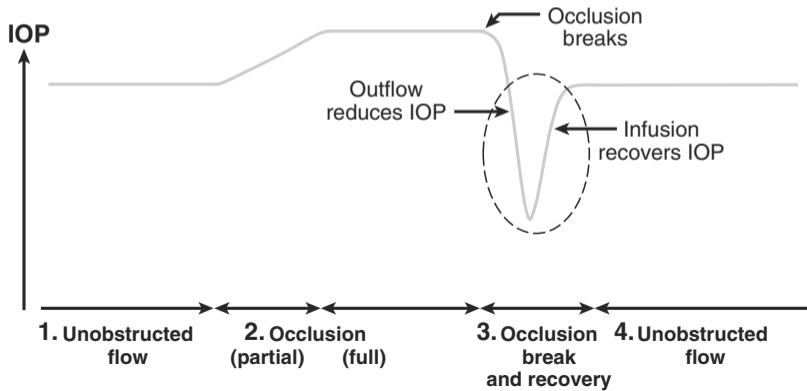

Supplement: MOESM1 [file 9474294]
